# Supplementary material
Source: PubMed Central journal article supplement (PMC3269154)
Supplement: supp_M021188_jlr.M021188-1.pdf [file supp_M021188_jlr.M021188-1.pdf]

## Supplementary Figures

### Diabetes induced myelin abnormalities are associated with an altered lipid pattern: protective effects of LXR activation

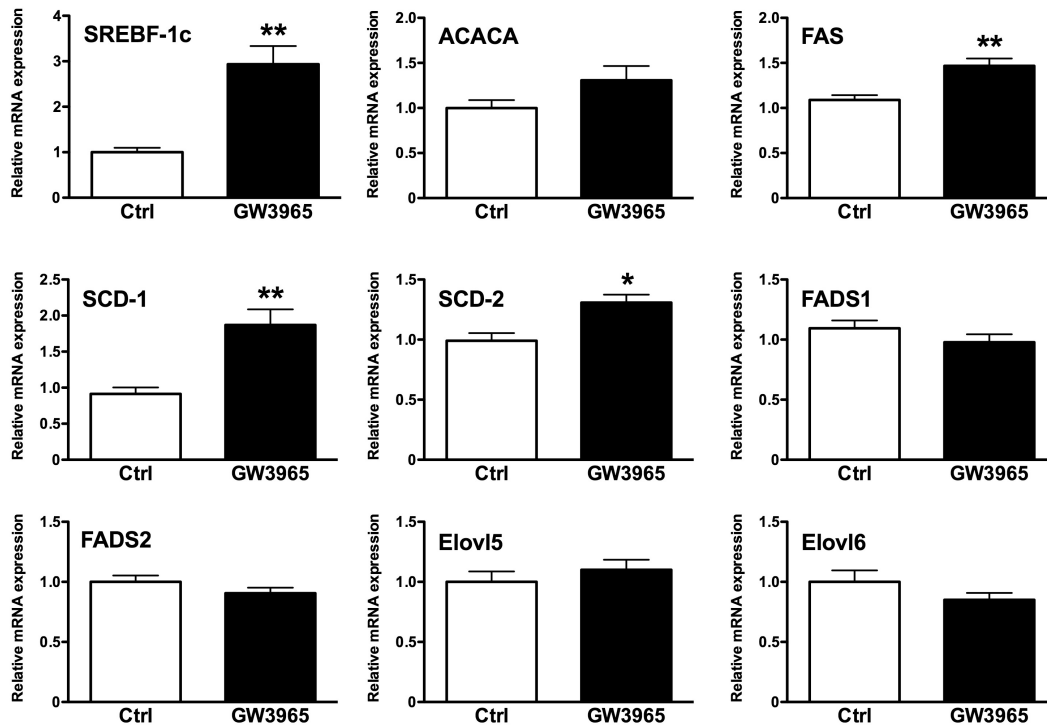

**Supplementary Fig. 1.** Expression profile of fatty acid biosynthesis genes in non-diabetic rats treated with vehicle (Ctrl) or GW3965. Statistical analysis was performed by Student *t* test. Data are expressed as mean  $\pm$  SEM.  $n=8$  animals per group. \* $P < 0.05$ , \*\* $P < 0.001$  vs. Ctrl rats.

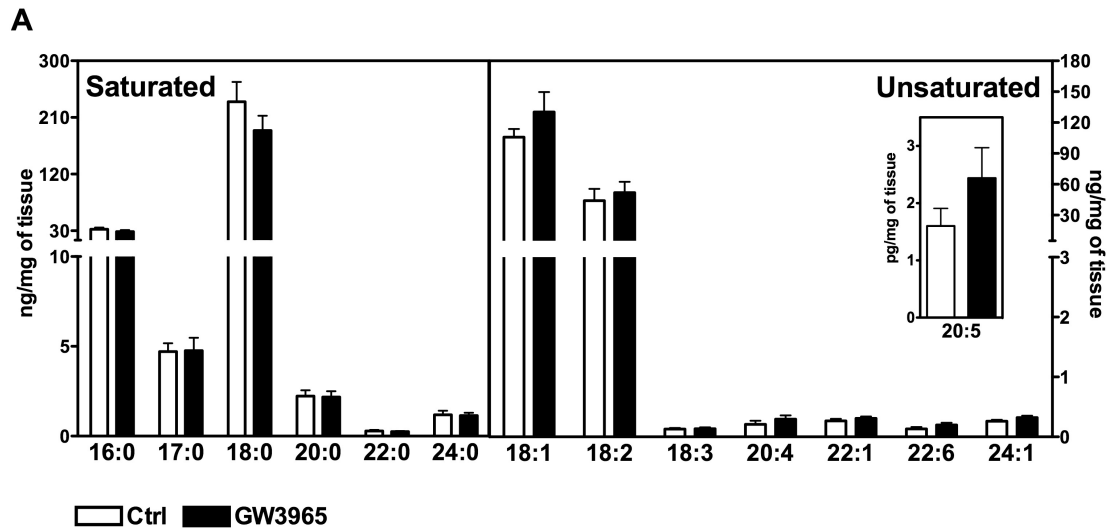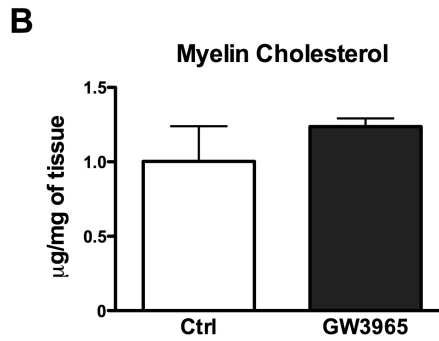

**Supplementary Fig. 2.** Lipidomic profile of sciatic nerve purified myelin from non-diabetic rats treated with vehicle (Ctrl) or GW3965. **A:** Fatty acids profile. **B:** Cholesterol levels. Data are expressed as mean  $\pm$  SEM. n= 8 animals per group.

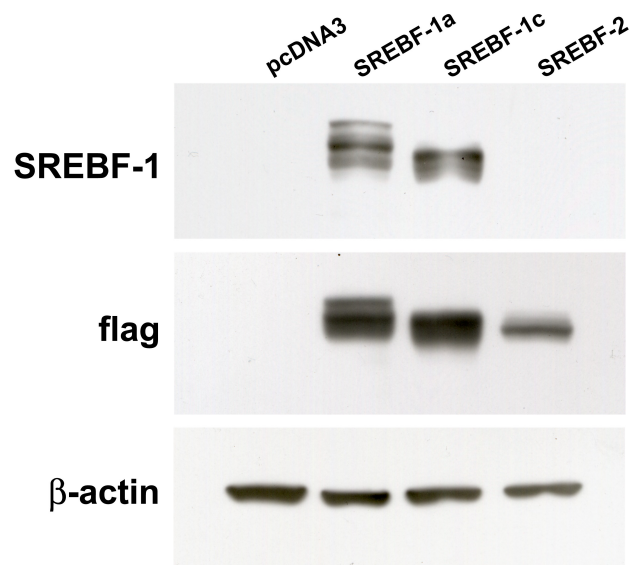

**Supplementary Fig. 3.** SREBF-1 antibody validation. Hek293T individually transfected with flag tagged mature forms of SREBF-1a, SREBF-1c and SREBF-2 and the control pcDNA3. Shown are the bands detected with the SREBF-1, flag or  $\beta$ -actin antibody.

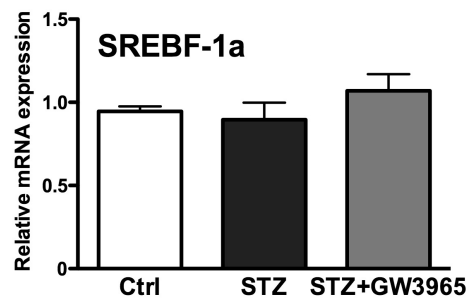

**Supplementary Fig. 4.** mRNA levels of SREBF-1a in control, STZ and STZ-GW3965 treated rats.
